# Supplementary material for: Dietary Protein Levels Modulate the Antioxidant Capacity during Different Growth Stages in Huanjiang Mini-Pigs
Source: MDPI journal article supplement (doi:10.3390/antiox12010148), 2023-01-07
Supplement: s1 [file s1]

## Supplementary Material

**Table S1** Ingredients and composition of the basal diet for 5–10 kg body weight stage (air-dried, %)

| Items                              | Dietary crude protein (CP) levels (%) |        |        |        |        |
|------------------------------------|---------------------------------------|--------|--------|--------|--------|
|                                    | 14                                    | 16     | 18     | 20     | 22     |
| <b>Ingredients, %</b>              |                                       |        |        |        |        |
| Corn                               | 61.20                                 | 56.20  | 51.80  | 47.50  | 42.70  |
| Soybean meal (43.9%)               | 5.70                                  | 10.10  | 13.20  | 15.60  | 18.80  |
| Fish meal                          | 2.00                                  | 2.00   | 2.00   | 2.00   | 2.00   |
| Wheat bran                         | 9.00                                  | 9.00   | 9.00   | 9.00   | 9.00   |
| Whey powder (85% lactose)          | 10.00                                 | 10.00  | 10.00  | 10.00  | 10.00  |
| Extruded full-fat soybean          | 5.00                                  | 5.00   | 5.00   | 5.00   | 5.00   |
| Soy protein concentrate            | 1.00                                  | 2.10   | 4.00   | 6.30   | 8.20   |
| Corn oil                           | 0.40                                  | 0.20   |        |        |        |
| L-Lys (98.5%)                      | 1.10                                  | 0.90   | 0.75   | 0.55   | 0.40   |
| DL-Met (99%)                       | 0.20                                  | 0.15   | 0.15   | 0.10   | 0.10   |
| L-Thr (99%)                        | 0.40                                  | 0.35   | 0.25   | 0.20   | 0.10   |
| L-Trp (99%)                        | 0.10                                  | 0.10   | 0.05   | 0.05   |        |
| Dicalcium phosphate                | 1.40                                  | 1.40   | 1.30   | 1.20   | 1.20   |
| Premix <sup>1</sup>                | 2.50                                  | 2.50   | 2.50   | 2.50   | 2.50   |
| Total                              | 100.00                                | 100.00 | 100.00 | 100.00 | 100.00 |
| <b>Nutrient levels<sup>2</sup></b> |                                       |        |        |        |        |
| Metabolic energy (MJ/kg)           | 13.73                                 | 13.69  | 13.68  | 13.72  | 13.74  |
| CP                                 | 14.09                                 | 16.10  | 18.10  | 20.07  | 22.08  |
| SID Lys                            | 1.36                                  | 1.34   | 1.36   | 1.34   | 1.36   |
| SID Met                            | 0.39                                  | 0.37   | 0.39   | 0.37   | 0.40   |
| SID Thr                            | 0.76                                  | 0.79   | 0.77   | 0.80   | 0.77   |
| SID Trp                            | 0.21                                  | 0.24   | 0.22   | 0.24   | 0.22   |
| Ca                                 | 0.79                                  | 0.80   | 0.80   | 0.79   | 0.80   |
| Total phosphorus                   | 0.66                                  | 0.69   | 0.69   | 0.70   | 0.72   |

<sup>1</sup>Provided the following per kg of the diet: Cu, 128 mg; Mn, 97.60 mg; Zn, 109 mg; Fe, 197.60 mg; Se, 1 mg; I, 1 mg; Co, 1 mg; VA, 32,500 IU; VD<sub>3</sub>, 10,000 IU; VE, 80 IU; VK<sub>3</sub>, 10 mg; VB<sub>1</sub>, 10 mg/kg; VB<sub>2</sub>, 25 mg; VB<sub>6</sub>, 8 mg; VB<sub>12</sub>, 0.075 mg; biotin, 0.075 mg; folic acid, 5 mg; nicotinamide, 100 mg; pantothenic acid, 50 mg; choline, 1,600 mg; limestone, 0.80%; NaCl, 0.30%; antimycotic, 0.10%; ethoxyquinoline (33%), 0.05%; acidifier, 0.25%.

<sup>2</sup>Calculated according to the nutrient requirements of swine (NRC, 2012); SID, standard ileal digestible.

**Table S2** Ingredients and composition of the basal diet for 10–20 kg body weight stage (air-dried, %)

| Items                              | Dietary crude protein (CP) levels (%) |        |        |        |        |
|------------------------------------|---------------------------------------|--------|--------|--------|--------|
|                                    | 12                                    | 14     | 16     | 18     | 20     |
| <b>Ingredients, %</b>              |                                       |        |        |        |        |
| Corn                               | 72.10                                 | 66.50  | 60.90  | 55.45  | 49.80  |
| Soybean meal (43.9%)               | 0.50                                  | 6.75   | 12.95  | 19.00  | 25.25  |
| Soybean meal (fermented)           | 4.00                                  | 4.00   | 4.00   | 4.00   | 4.00   |
| Fish meal                          | 2.00                                  | 2.00   | 2.00   | 2.00   | 2.00   |
| Wheat bran                         | 8.00                                  | 8.00   | 8.00   | 8.00   | 8.00   |
| Whey powder (85% lactose)          | 5.00                                  | 5.00   | 5.00   | 5.00   | 5.00   |
| Soybean oil                        | 0.80                                  | 0.60   | 0.40   | 0.20   |        |
| L-Lys (98.5%)                      | 1.10                                  | 0.95   | 0.75   | 0.60   | 0.40   |
| DL-Met (99%)                       | 0.20                                  | 0.15   | 0.15   | 0.10   | 0.10   |
| L-Thr (99%)                        | 0.45                                  | 0.35   | 0.30   | 0.20   | 0.10   |
| L-Trp (99%)                        | 0.15                                  | 0.10   | 0.05   | 0.05   |        |
| Dicalcium phosphate                | 1.20                                  | 1.10   | 1.00   | 0.90   | 0.85   |
| Premix <sup>1</sup>                | 4.50                                  | 4.50   | 4.50   | 4.50   | 4.50   |
| Total                              | 100.00                                | 100.00 | 100.00 | 100.00 | 100.00 |
| <b>Nutrient Levels<sup>2</sup></b> |                                       |        |        |        |        |
| Metabolic energy (MJ/kg)           | 13.73                                 | 13.68  | 13.64  | 13.59  | 13.54  |
| CP                                 | 12.06                                 | 14.08  | 16.10  | 18.08  | 20.08  |
| SID Lys                            | 1.22                                  | 1.24   | 1.22   | 1.24   | 1.23   |
| SID Met                            | 0.38                                  | 0.35   | 0.38   | 0.35   | 0.38   |
| SID Thr                            | 0.74                                  | 0.72   | 0.75   | 0.73   | 0.71   |
| SID Trp                            | 0.23                                  | 0.21   | 0.19   | 0.22   | 0.20   |
| Ca                                 | 0.70                                  | 0.70   | 0.70   | 0.69   | 0.70   |
| Total phosphorus                   | 0.59                                  | 0.60   | 0.61   | 0.61   | 0.63   |

<sup>1</sup>Provided the following per kg of the diet: Cu, 128 mg; Mn, 97.6 mg; Zn, 109 mg; Fe, 197.6 mg; Se, 1 mg; I, 1 mg; Co, 1 mg; VA, 32,500 IU; VD<sub>3</sub>, 10,000 IU; VE, 80 IU; VK<sub>3</sub>, 10 mg; VB<sub>1</sub>, 10 mg/kg; VB<sub>2</sub>, 25 mg; VB<sub>6</sub>, 8 mg; VB<sub>12</sub>, 0.075 mg; biotin, 0.075 mg; folic acid, 5 mg; nicotinamide, 100 mg; pantothenic acid, 50 mg; choline, 1,600 mg; limestone, 0.80%; sucrose, 2%; NaCl, 0.3%; antimycotic, 0.10%; ethoxyquinoline (33%), 0.05%; acidifier, 0.25%.

<sup>2</sup>Calculated according to the nutrient requirements of swine (NRC, 2012); SID, standard ileal digestible.

**Table S3** Ingredients and composition of the basal diet for 20–30 kg body weight stage (air-dried, %)

| Items                              | Dietary crude protein (CP) levels (%) |        |        |        |        |
|------------------------------------|---------------------------------------|--------|--------|--------|--------|
|                                    | 10                                    | 12     | 14     | 16     | 18     |
| <b>Ingredients, %</b>              |                                       |        |        |        |        |
| Corn                               | 69.65                                 | 64.25  | 58.65  | 53.35  | 47.60  |
| Soybean meal (43.9%)               | 1.00                                  | 6.90   | 13.20  | 19.10  | 25.50  |
| Soybean meal (fermented)           | 2.00                                  | 2.00   | 2.00   | 2.00   | 2.00   |
| Wheat bran                         | 12.00                                 | 12.00  | 12.00  | 12.00  | 12.00  |
| Rice hull and bran                 | 5.00                                  | 5.00   | 5.00   | 5.00   | 5.00   |
| Soybean oil                        | 3.00                                  | 2.80   | 2.60   | 2.30   | 2.10   |
| L-Lys (98.5%)                      | 0.95                                  | 0.80   | 0.60   | 0.45   | 0.25   |
| DL-Met (99%)                       | 0.15                                  | 0.15   | 0.10   | 0.10   | 0.05   |
| L-Thr (99%)                        | 0.35                                  | 0.30   | 0.20   | 0.15   | 0.05   |
| L-Trp (99%)                        | 0.10                                  | 0.10   | 0.05   | 0.05   |        |
| Dicalcium phosphate                | 1.10                                  | 1.00   | 0.90   | 0.80   | 0.75   |
| Premix <sup>1</sup>                | 4.70                                  | 4.70   | 4.70   | 4.70   | 4.70   |
| Total                              | 100.00                                | 100.00 | 100.00 | 100.00 | 100.00 |
| <b>Nutrient levels<sup>2</sup></b> |                                       |        |        |        |        |
| Metabolic energy (MJ/kg)           | 13.27                                 | 13.23  | 13.18  | 13.12  | 13.06  |
| CP                                 | 10.12                                 | 12.11  | 14.10  | 16.10  | 18.13  |
| SID Lys                            | 1.00                                  | 1.01   | 1.00   | 1.01   | 1.00   |
| SID Met                            | 0.29                                  | 0.31   | 0.29   | 0.31   | 0.29   |
| SID Thr                            | 0.59                                  | 0.61   | 0.59   | 0.62   | 0.60   |
| SID Trp                            | 0.17                                  | 0.20   | 0.18   | 0.21   | 0.19   |
| Ca                                 | 0.67                                  | 0.67   | 0.66   | 0.66   | 0.67   |
| Total phosphorus                   | 0.54                                  | 0.54   | 0.55   | 0.56   | 0.57   |

<sup>1</sup>Provided the following per kg of the diet: Cu, 128 mg; Mn, 97.6 mg; Zn, 109 mg; Fe, 197.6 mg; Se, 1 mg; I, 1 mg; Co, 1 mg; VA, 32,500 IU; VD<sub>3</sub>, 10,000 IU; VE, 80 IU; VK<sub>3</sub>, 10 mg; VB<sub>1</sub>, 10 mg/kg; VB<sub>2</sub>, 25 mg; VB<sub>6</sub>, 8 mg; VB<sub>12</sub>, 0.075 mg; biotin, 0.075 mg; folic acid, 5 mg; nicotinamide, 100 mg; pantothenic acid, 50 mg; choline, 1,600 mg; limestone, 1%; sucrose, 2%; NaCl, 0.3%; antimycotic, 0.10%; ethoxyquinoline (33%), 0.05%; acidifier, 0.25%.

<sup>2</sup>Calculated according to the nutrient requirements of swine (NRC, 2012); SID, standard ileal digestible.

**Table S4** Primer sequences for intestinal mucosa mRNA analysis

| Genes          | Primers (5'-3')                                              | Amplicon Size (bp) | Accession NO.  |
|----------------|--------------------------------------------------------------|--------------------|----------------|
| <i>β-Actin</i> | F: GATCTGGCACCACACCTTCTACAAC<br>R: TCATCTTCTCACGGTTGGCTTTGG  | 107                | XM_021086047.1 |
| <i>CAT</i>     | F: AGCCTACGTCTCTGAGTCTCTGC<br>R: TCCATATCCGTTTCATGTGCCTGTG   | 90                 | NM_214301.2    |
| <i>CuZnSOD</i> | F: CCAGTGCAGGTCCTCACTTCAATC<br>R: CGGCCAATGATGGAATGGTCTCC    | 172                | NM_001190422.1 |
| <i>GPx-1</i>   | F: TGCTCATTGAGAACGTAGCGT<br>R: CAGGATCTCCCCATTCTTGGC         | 161                | NM_214201.1    |
| <i>GPx-4</i>   | F: GATTCTGGCCTTCCCTTGC<br>R: TCCCCTTGGGCTGGACTTT             | 173                | NM_214407.1    |
| <i>KEAP-1</i>  | F: CGCCTCATCGAGTTCGCTTACAC<br>R: GCACGGACCACACTGTCAATCTG     | 107                | NM_001114671.1 |
| <i>MnSOD2</i>  | F: GGACAAATCTGAGCCCTAACG<br>R: CCTTGTTGAAACCGAGCC            | 159                | NM_214127.2    |
| <i>NQO-1</i>   | F: GTGGAAGCCGCAGACCTTGTG<br>R: CGTTCAAACCAGCCTTTCAGAATAGC    | 83                 | NM_001159613.1 |
| <i>Nrf-1</i>   | F: CGATGCTTCAGAATTGCCAACTACAG<br>R: GCGTTGTCTGGATGGTCATCTCAC | 125                | XM_021078993.1 |
| <i>Nrf-2</i>   | F: CCAATTCAGCCAGCACAACACATC<br>R: GACTGAGCCTGGTTAGGAGCAATG   | 149                | XM_003133500   |

*CAT*, catalase; *GPX*, Glutathione peroxidase; *KEAP*, Kelch like ECH associated protein; *NQO1*, quinone oxidoreductase 1; *Nrf*, nuclear respiratory factor.
